# Supplementary material
Source: MDPI journal article supplement (https://www.mdpi.com/2073-4344/11/7/824)
Supplement: s1 [file s1]

# Experimental and Theoretical Studies of Sonically Prepared Cu–Y, Cu–USY and Cu–ZSM-5 Catalysts for SCR deNO<sub>x</sub>

Przemysław J. Jodłowski <sup>1,\*†</sup>, Izabela Czekaj <sup>1,\*†</sup>, Patrycja Stachurska <sup>1</sup>, Łukasz Kuterasiński <sup>2</sup>, Lucjan Chmielarz <sup>3</sup>, Roman J. Jędrzejczyk <sup>4</sup>, Piotr Jeleń <sup>5</sup>, Maciej Sitarz <sup>5</sup>, Sylwia Górecka <sup>6</sup>, Michał Mazur <sup>7</sup> and Izabela Kurzydym <sup>1</sup>

<sup>1</sup> Faculty of Chemical Engineering and Technology, Cracow University of Technology, Warszawska 24,

31-155 Kraków, Poland; patrycja.stachurska@gmail.com (P.S.);

izabela.kurzydym@doktorant.pk.edu.pl (I.K.)

<sup>2</sup> Jerzy Haber Institute of Catalysis and Surface Chemistry, Polish Academy of Sciences, Niezapominajek 8, 30-239 Kraków, Poland; [nckutera@cyf-kr.edu.pl](mailto:nckutera@cyf-kr.edu.pl)

<sup>3</sup> Faculty of Chemistry, Jagiellonian University, Gronostajowa 2, 30-387 Kraków, Poland; [lucjan.chmielarz@uj.edu.pl](mailto:lucjan.chmielarz@uj.edu.pl)

<sup>4</sup> Małopolska Centre of Biotechnology, Jagiellonian University, Gronostajowa 7A, 30-387 Kraków, Poland; [roman.jedrzejczyk@uj.edu.pl](mailto:roman.jedrzejczyk@uj.edu.pl)

<sup>5</sup> Faculty of Materials Science and Ceramics, AGH University of Science and Technology, al. Mickiewicza 30, 30-059 Kraków, Poland; [pjelen@agh.edu.pl](mailto:pjelen@agh.edu.pl) (P.J.); [msitarz@agh.edu.pl](mailto:msitarz@agh.edu.pl) (M.S.)

<sup>6</sup> Institute of Environmental Technology, CEET, VSB—Technical University of Ostrava, 17. Listopadu 15/2172, 708 00 Ostrava, Czech Republic; [sylwia.gorecka@vsb.cz](mailto:sylwia.gorecka@vsb.cz)

<sup>7</sup> Department of Physical and Macromolecular Chemistry, Faculty of Science, Charles University, Hlavova 8, 128 43 Prague, Czech Republic; [michal.mazur@natur.cuni.cz](mailto:michal.mazur@natur.cuni.cz)

\* Correspondence: [przemyslaw.jodlowski@pk.edu.pl](mailto:przemyslaw.jodlowski@pk.edu.pl) (P.J.J.); [izabela.czekaj@pk.edu.pl](mailto:izabela.czekaj@pk.edu.pl) (I.C.); Tel.: +48-12-6282760 (P.J.J.); Tel.: +48-12-6282111 (I.C.)

† P.J. Jodłowski and I. Czekaj declare to be equally first authors.

**Keywords:** zeolites, deNO<sub>x</sub>, sonication, DFT, reaction mechanism, copper catalysts

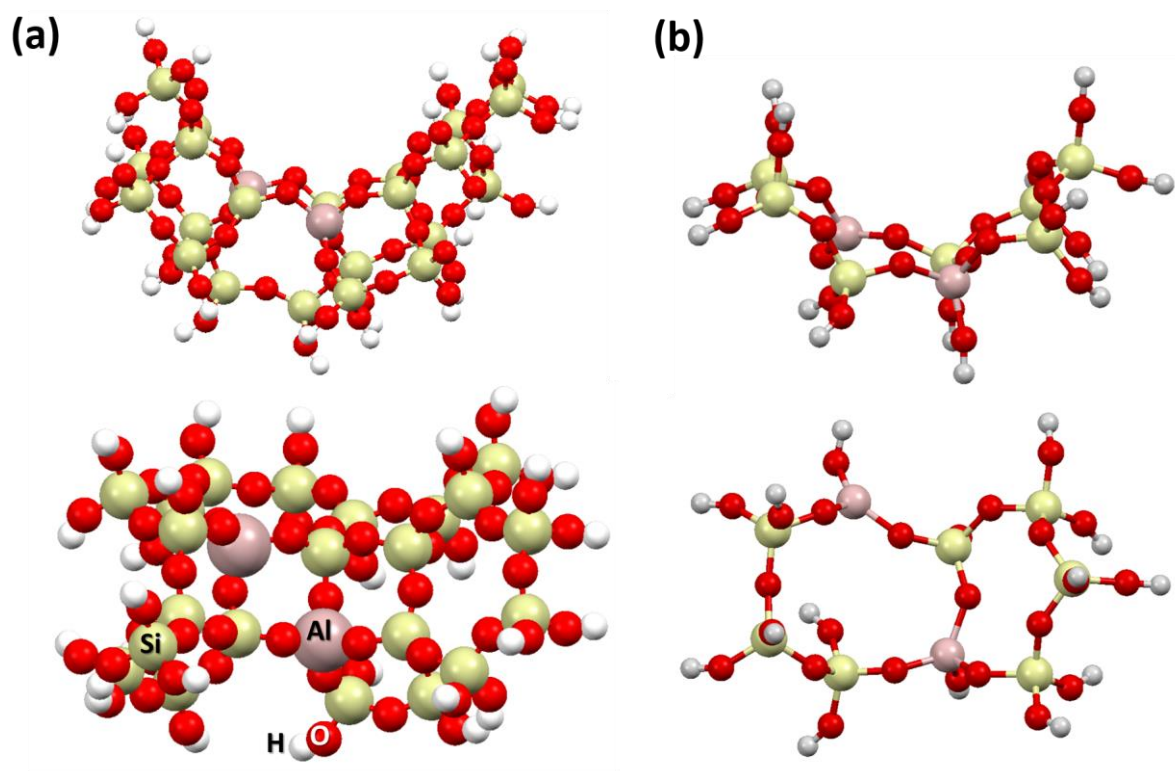

**Figure S1.** Cluster model of (a) Y/USY ( $\text{Al}_2\text{Si}_{22}\text{O}_{66}\text{H}_{36}$ ) zeolite and (b) ZSM-5 ( $\text{Al}_2\text{Si}_7\text{O}_{25}\text{H}_{15}$ )

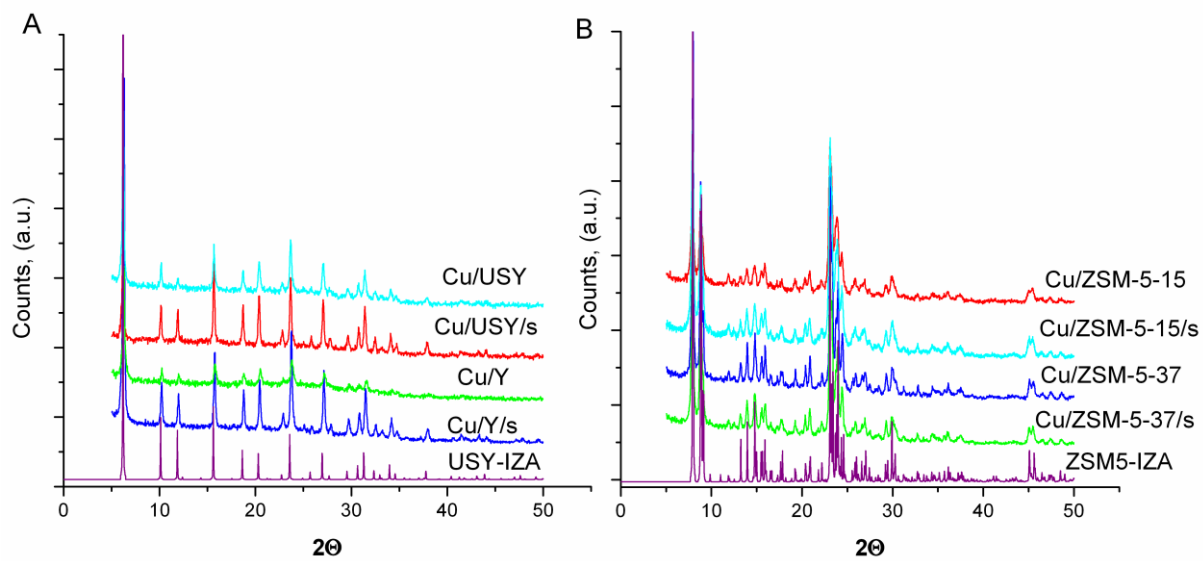

**Figure S2.** XRD of the zeolites; A) Cu/Y and Cu/USY samples, B) Cu/ZSM-5-15 and Cu/ZSM-5-37 samples

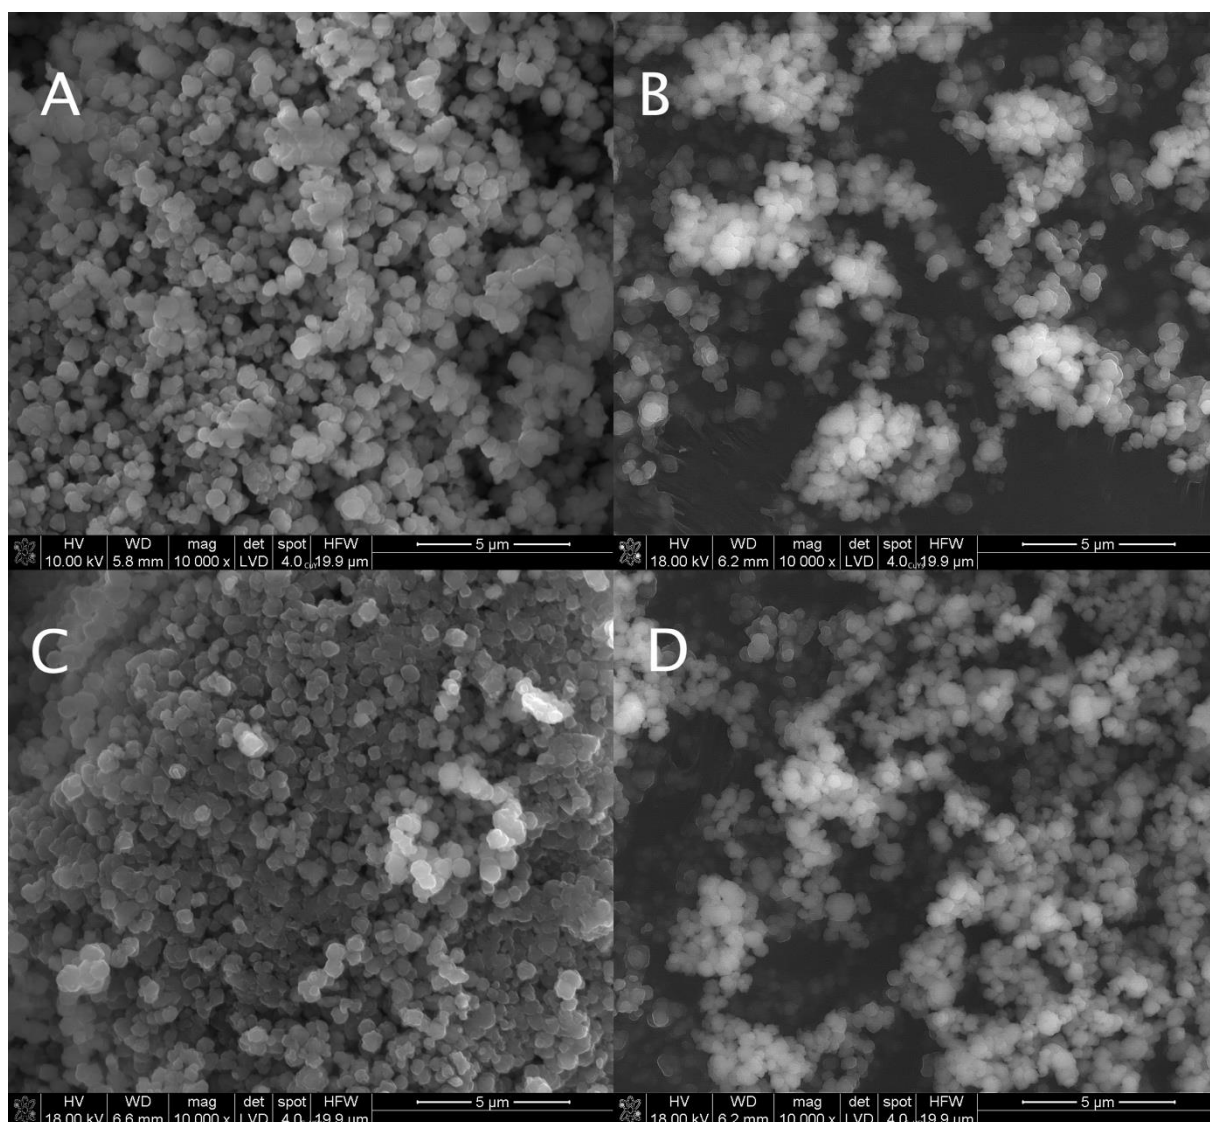

**Figure S3.** SEM images of Cu/USY and Cu/Y samples; A) Cu/Y, B) Cu/Y/s, C) Cu/USY, D) Cu/USY/s

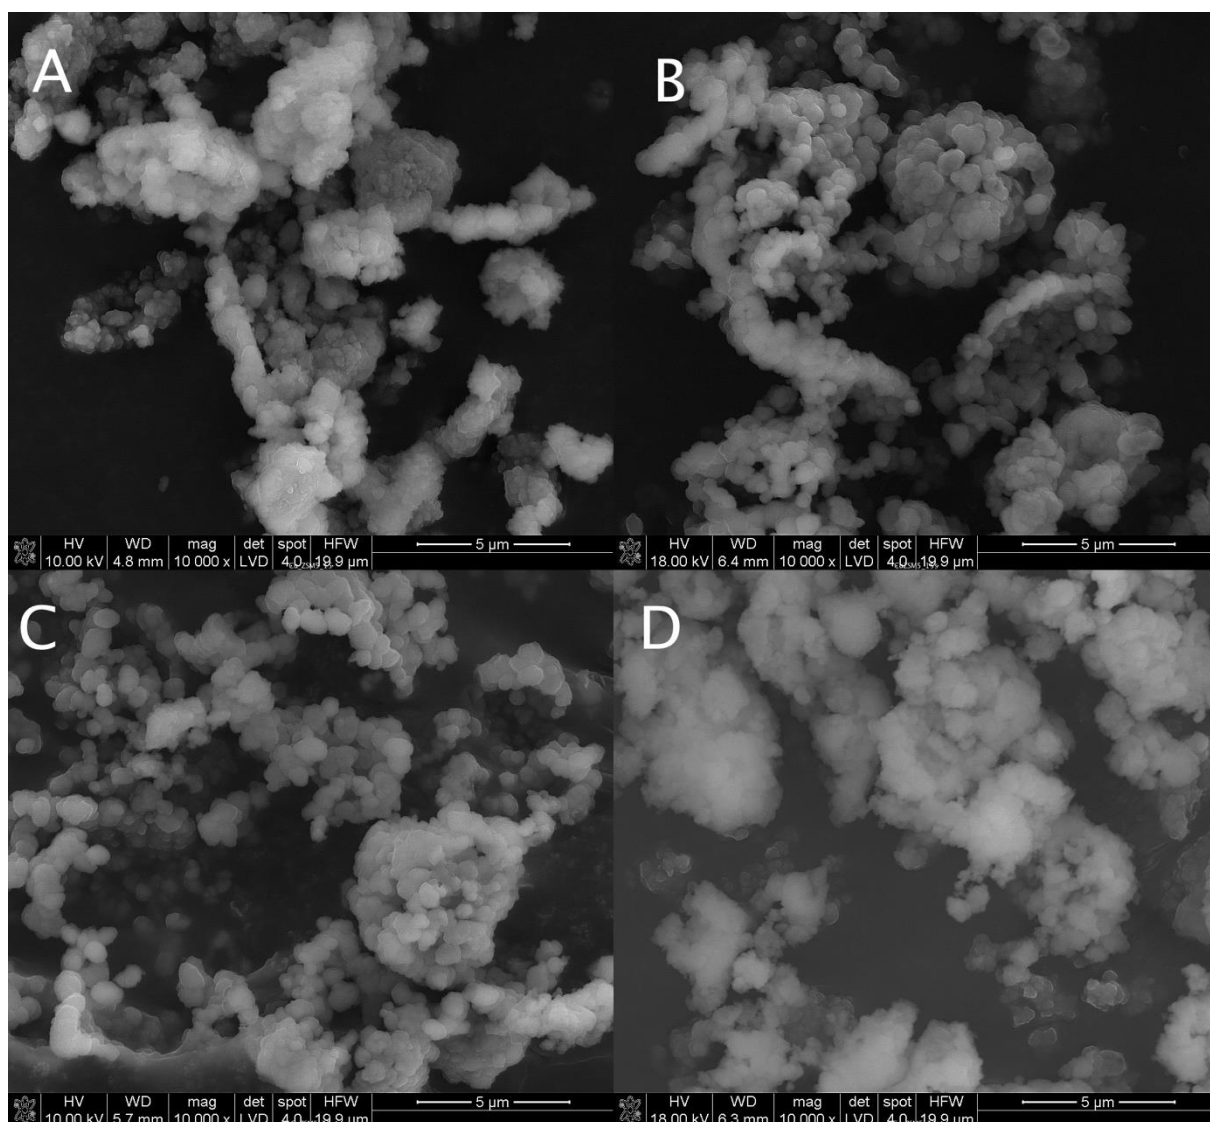

**Figure S4.** SEM images of Cu/ ZSM-5 samples: A) Cu/ZSM-5-15, B) Cu/ ZSM-5-15/s, C) Cu/ ZSM-5-37, D) Cu/ ZSM-5-37/s

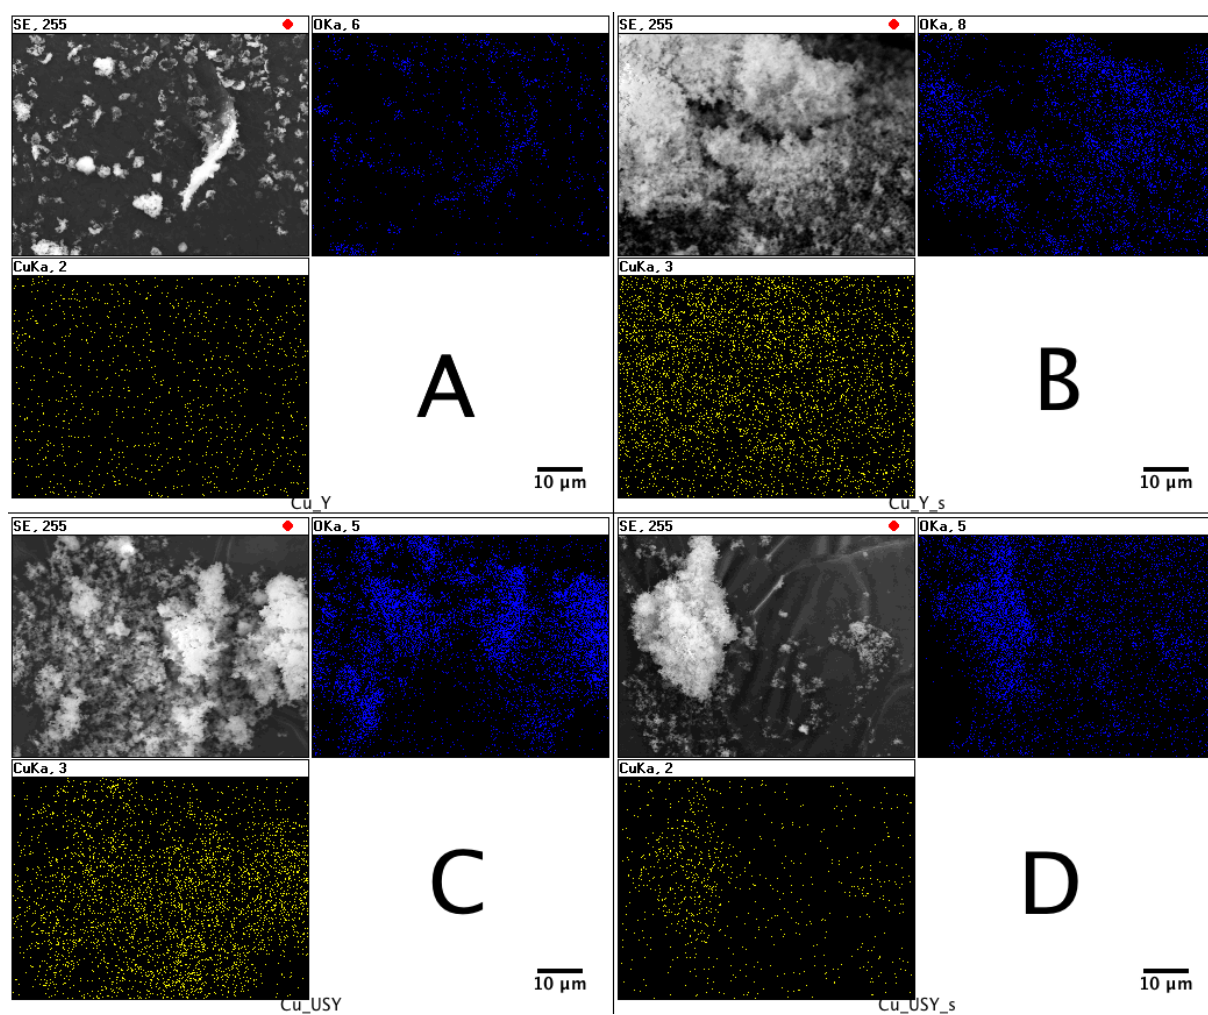

**Figure S5.** SEM mapping of Cu/USY and Cu/Y samples: A) Cu/Y, B) Cu/Y/s, C) Cu/USY, D) Cu/USY/s; blue-oxygen, yellow-copper

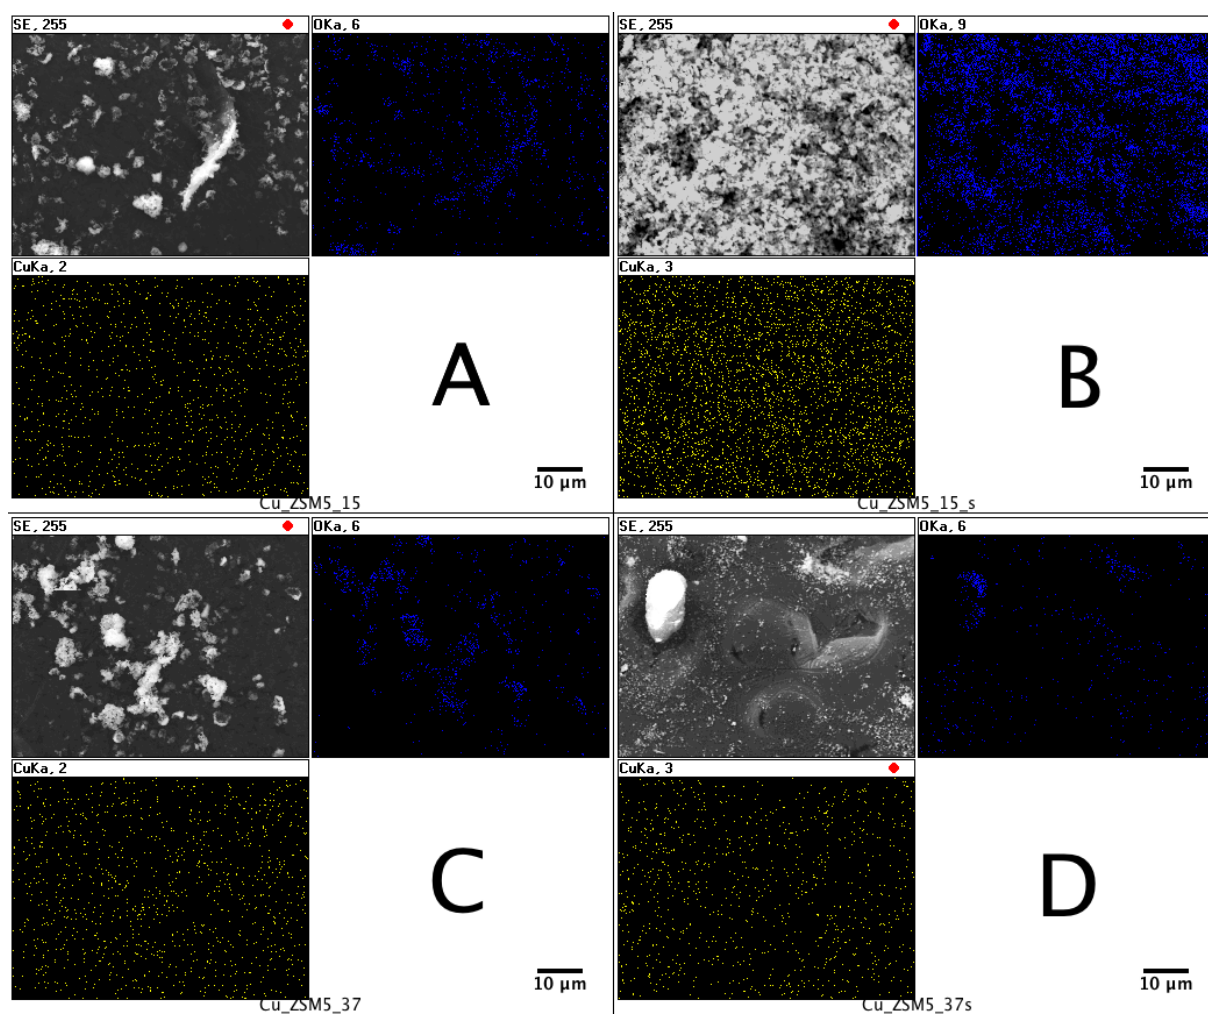

**Figure S6.** SEM mapping of Cu/ZSM-5 samples; A) Cu/ZSM-5-15, B) Cu/ ZSM-5-15/s, C) Cu/ ZSM-5-37, D) Cu/ ZSM-5-37/s; blue-oxygen, yellow-copper

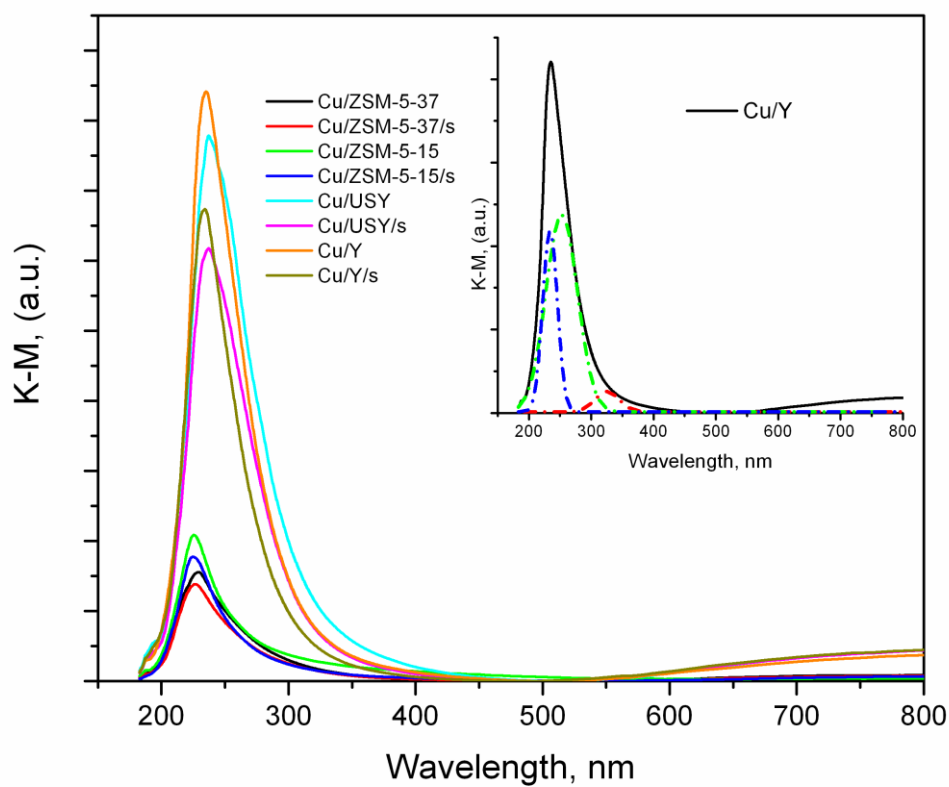

**Figure S7.** In-situ UV-Vis spectra of prepared samples with exemplary deconvolution of Cu/Y sample (inset)

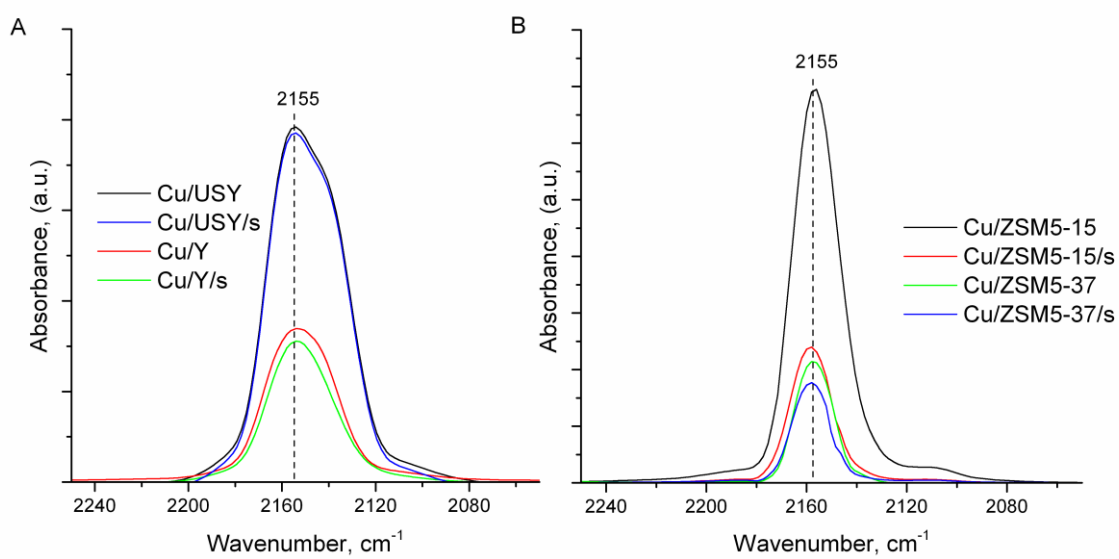

**Figure S8.** *In situ* FTIR spectra of the zeolite samples with adsorbed CO at room temperature: A) Cu/Y and Cu/USY, B) Cu/ZSM-5-15 Cu/ZSM-5-37



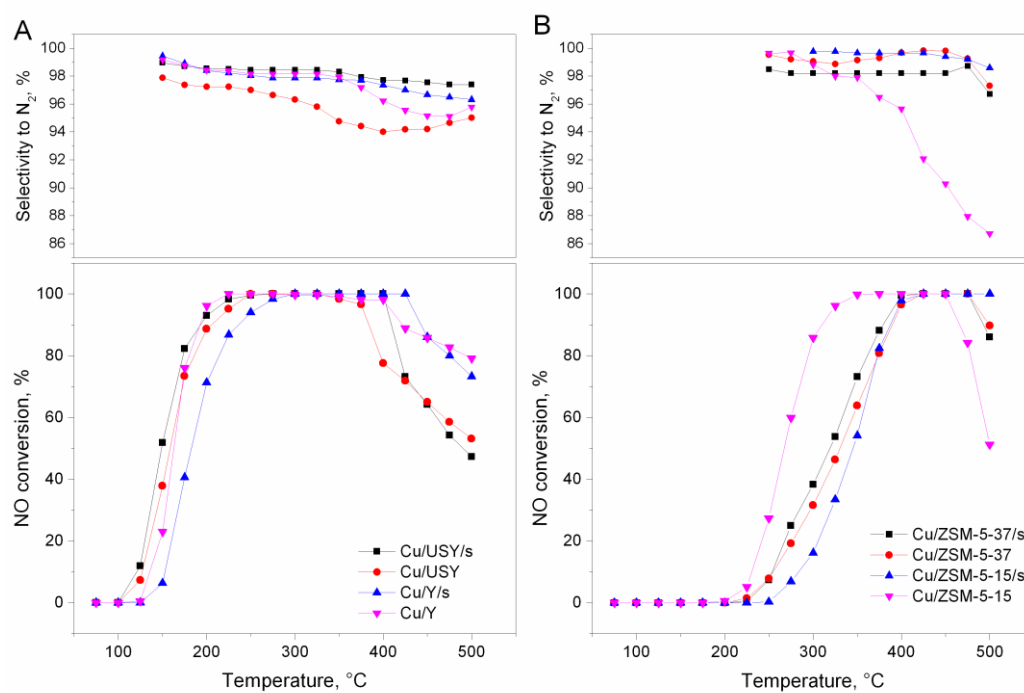

**Figure S9.** Catalytic activity and selectivity to  $N_2$ : A) Cu/Y and Cu/USY samples, B) Cu/ZSM-5-based samples

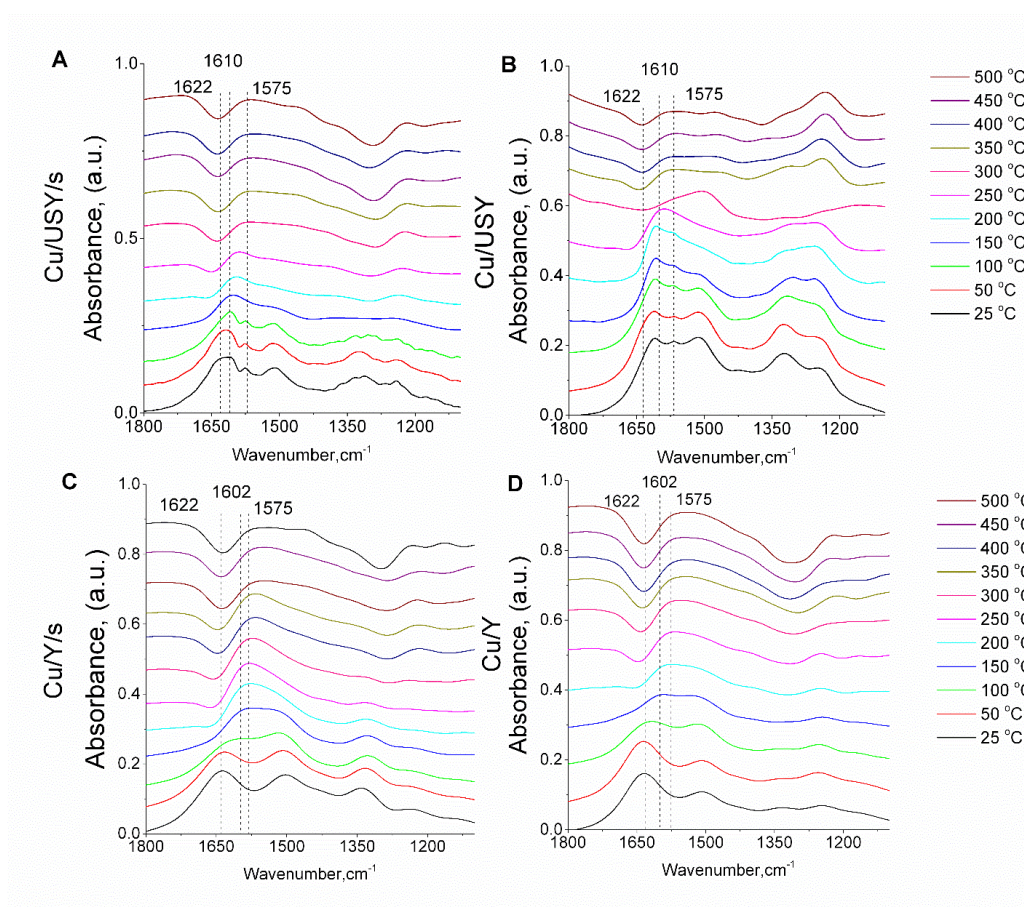

**Figure S10.** *In situ* DRIFT spectra of  $NO_x$  dynamic sorption experiments; A) Cu/USY/s, B) Cu/USY, C) Cu/Y/s, D) Cu/Y.



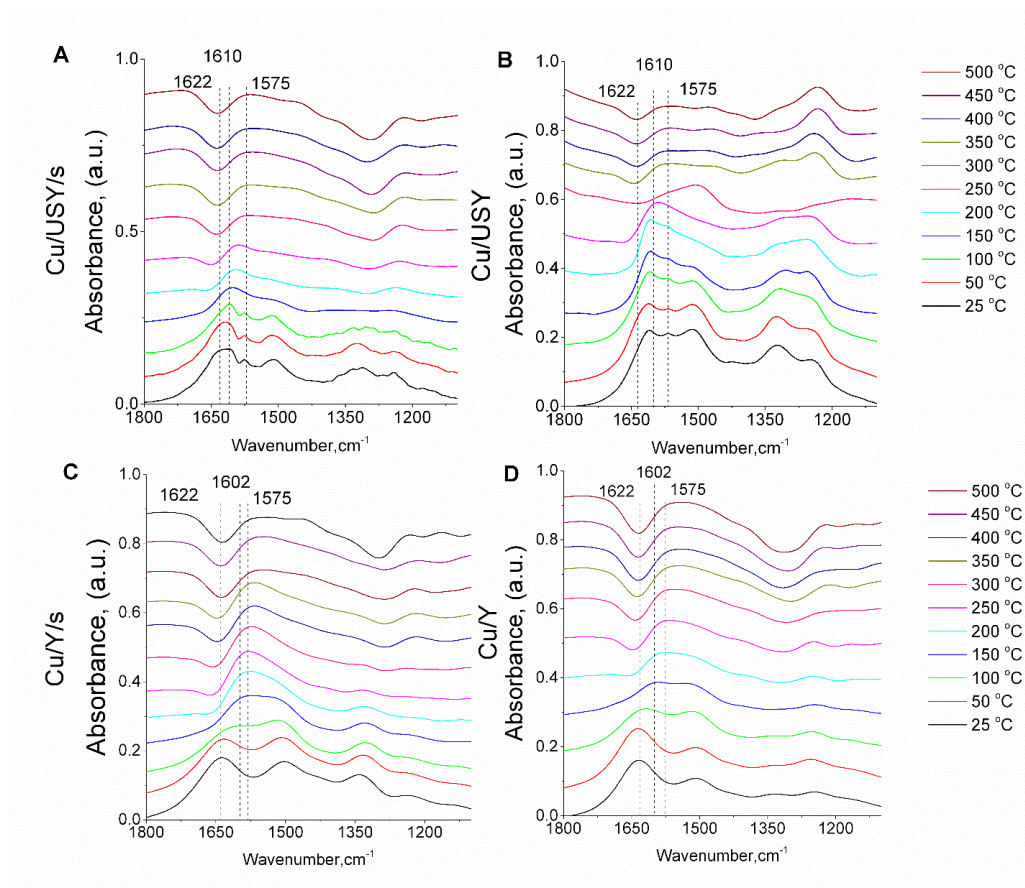

**Figure S11.** *In situ* DRIFT spectra of NO<sub>x</sub> dynamic sorption experiments; A) Cu/ZSM-5-15/s, B) Cu/ZSM-5-15, C) Cu/ZSM-5-37/s, D) Cu/ZSM-5-37

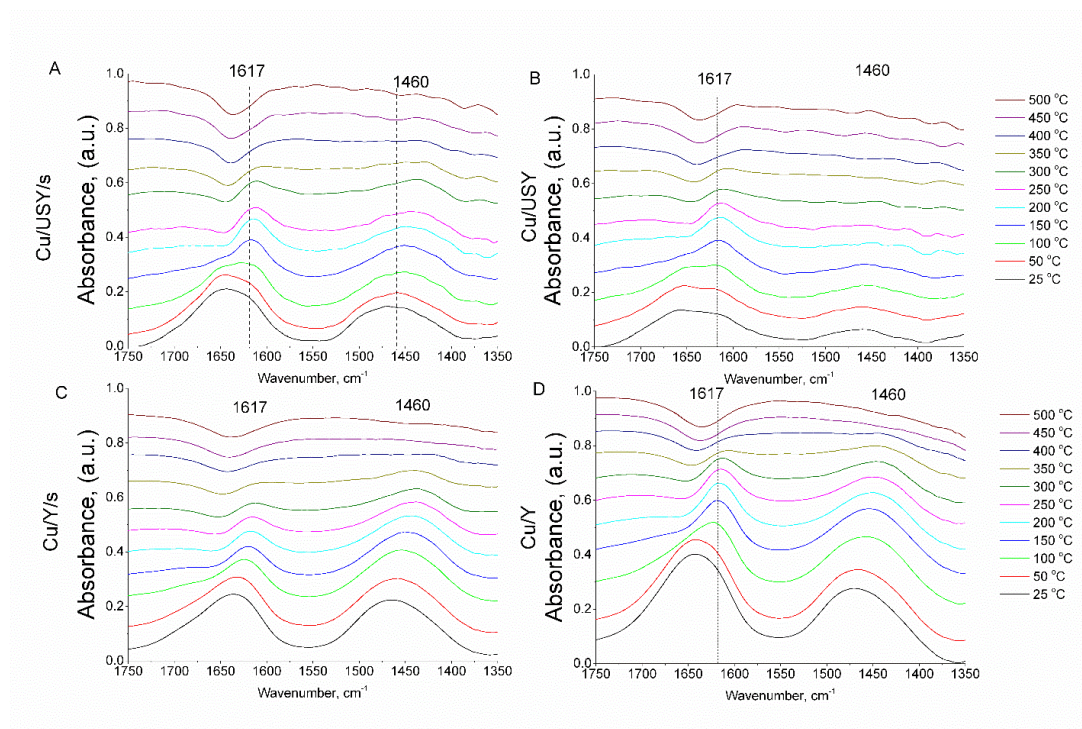

**Figure S12.** *In situ* DRIFT spectra of NH<sub>3</sub> dynamic sorption experiments; A) Cu/USY/s, B) Cu/USY, C) Cu/Y/s, D) Cu/Y



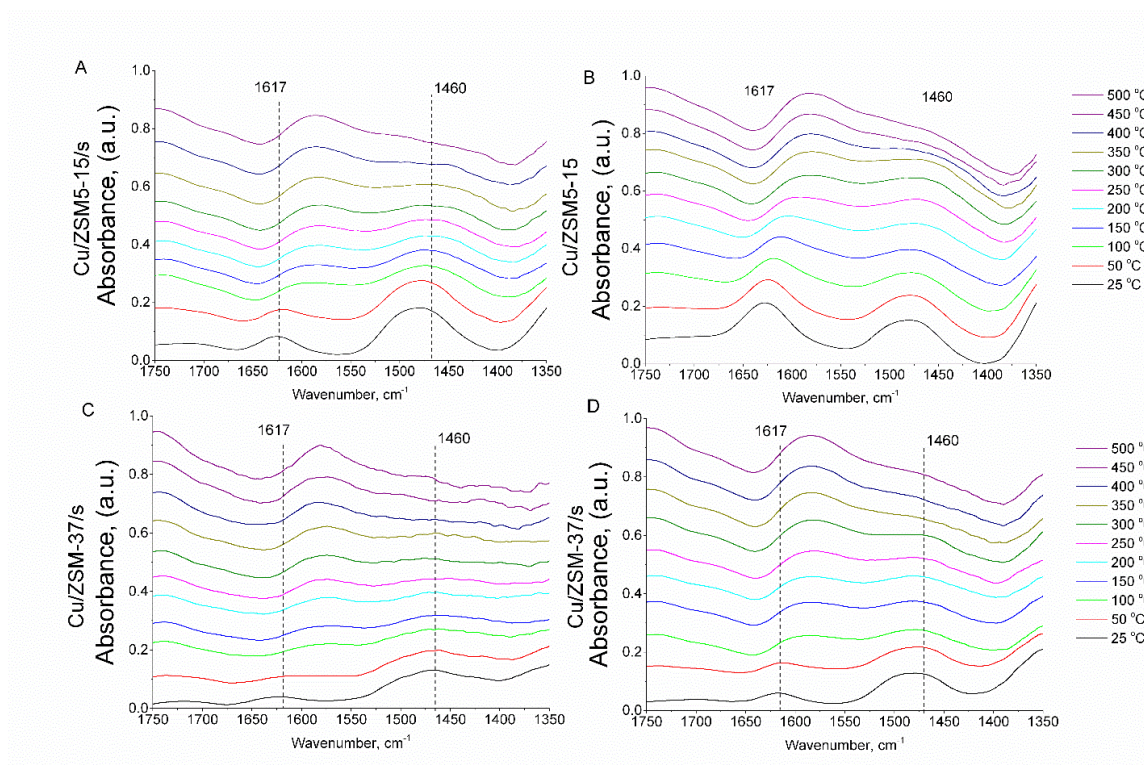

**Figure S13.** *In situ* DRIFT spectra of  $\text{NH}_3$  dynamic sorption experiments; A) Cu/ZSM-5-15/s, B) Cu/ZSM-5-15, C) Cu/ZSM-5-37/s, D) Cu/ZSM-5-37

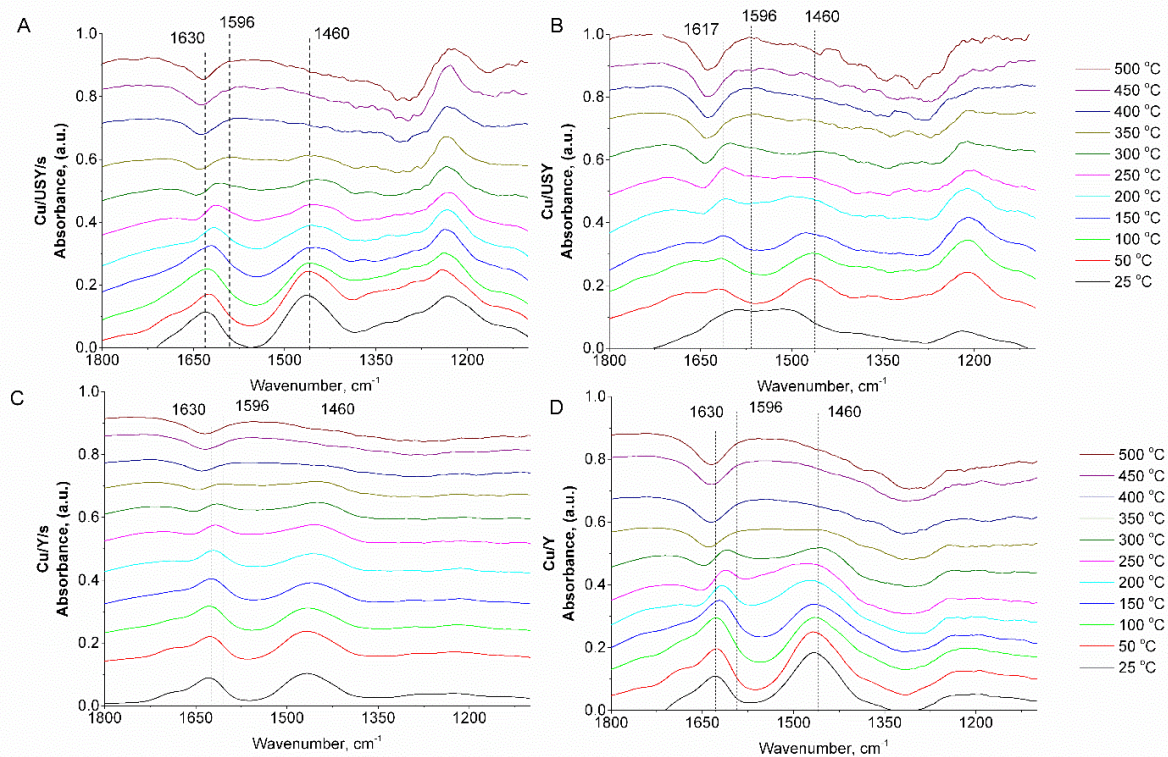

**Figure S14.** *In situ* DRIFT spectra of SCR deNO<sub>x</sub> experiments: A) Cu/USY/s, B) Cu/USY, C) Cu/Y/s, D) Cu/Y



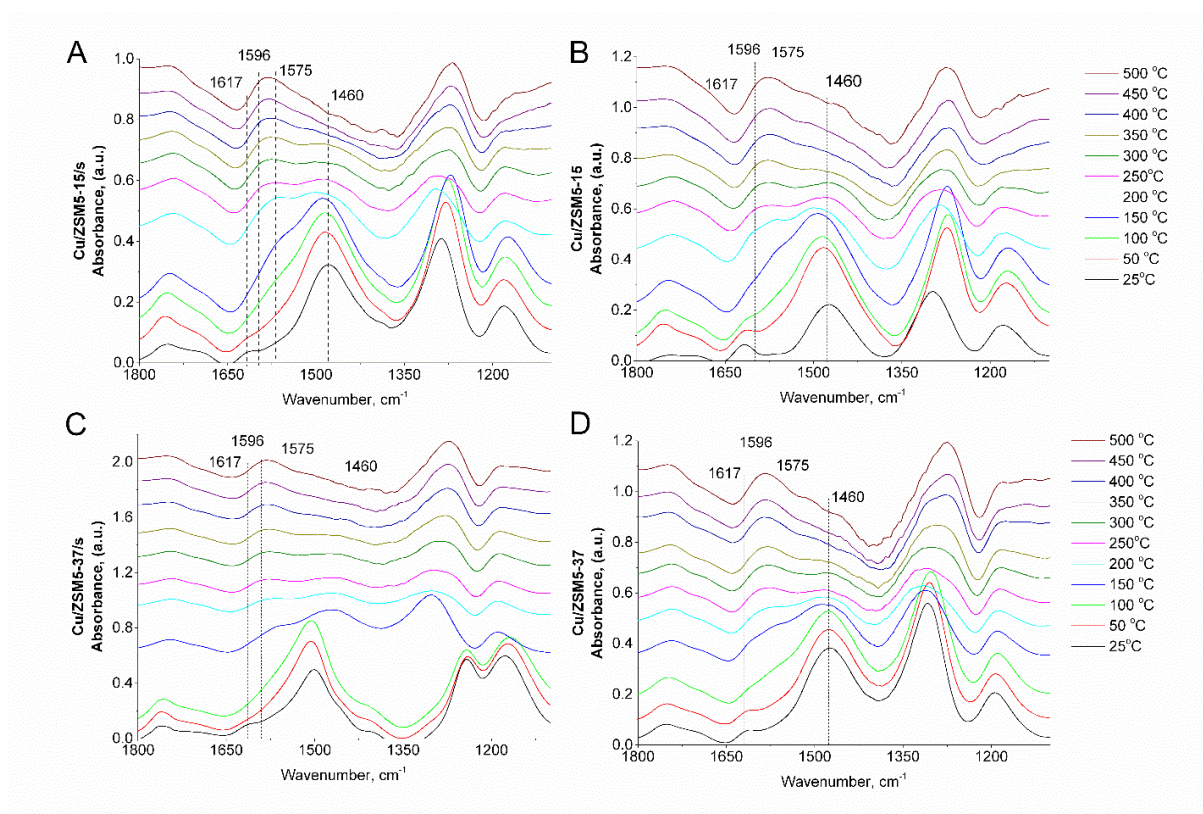

**Figure S15.** *In-situ* DRIFT spectra of SCR deNO<sub>x</sub> experiments; A) Cu/ZSM-5-15/s, B) Cu/ZSM-5-15, C) Cu/ZSM-5-37/s, D) Cu/ZSM-5-37

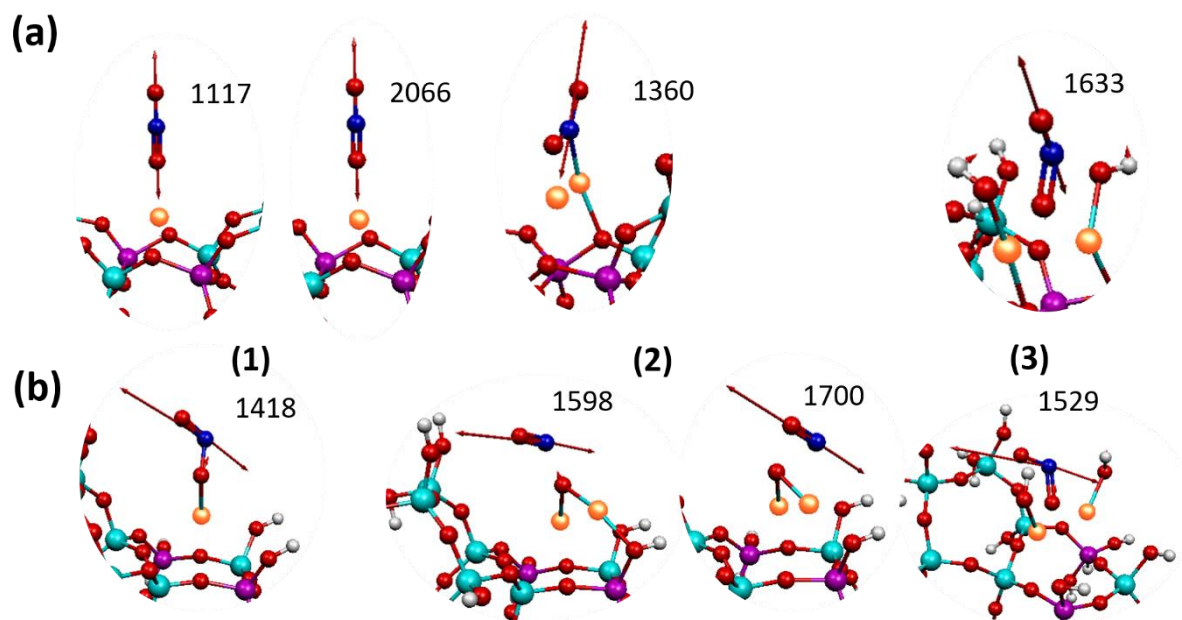

**Figure S16.** Adsorption of NO on: (a) Y/USY and (b) ZSM-5. (1) CuO monomer, (2) Cu<sub>2</sub>O dimer and (3) Cu<sub>2</sub>O(OH)<sub>2</sub> hydrated dimer

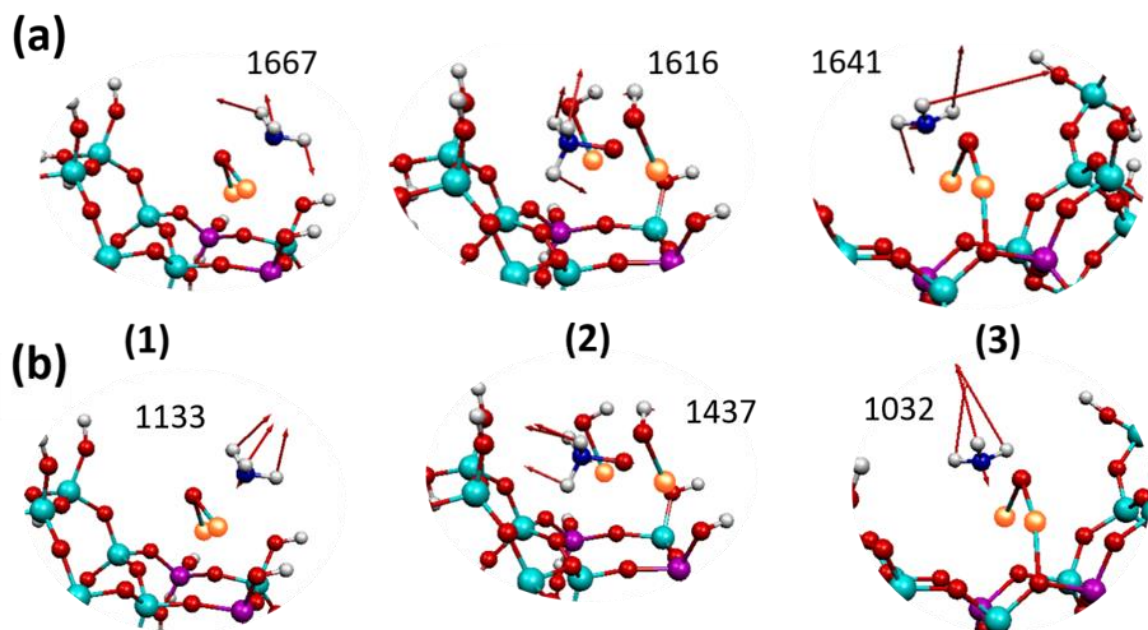

**Figure S17.** Vibration of  $\text{NH}_3$  adsorbed on (a) Y/USY and (b) ZSM-5. (1)  $\text{Cu}_2\text{O}$  dimer and (2)  $\text{Cu}_2\text{O}(\text{OH})_2$  hydrated dimer, (3)  $\text{Cu}_2\text{O}$  dimer

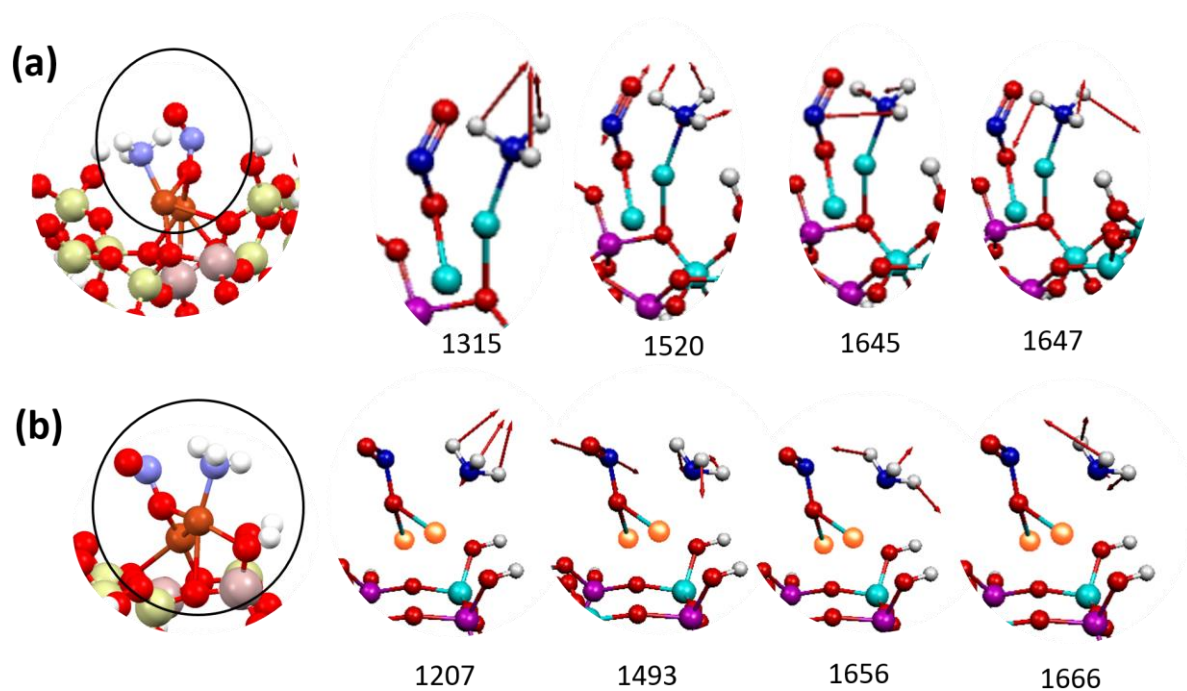

**Figure S18.** Co-adsorption of  $\text{NO}$  and  $\text{NH}_3$  on  $\text{Cu}_2\text{O}$  dimer over (a) Y/USY and (b) ZSM-5 zeolite
